# Supplementary material
Source: PubMed Central journal article supplement (PMC7486331)
Supplement: mmc5.pdf [file mmc5.pdf]

## Author statements

Please insert the relevant text under the subheadings below. A completed form must be signed by all authors. Please note that we will accept hand-signed and electronic (typewritten) signatures. Please complete multiple forms if necessary, and upload the signed copy with your submission.

**Manuscript title:** Follow-up study of the pulmonary function and related physiological characteristics of COVID-19 survivors three months after recovery

**Corresponding author:** Aiguo Xu, Yanfeng Gao, and Hong Luo.

**Article type:** Research paper

I irrevocably authorise and grant my full consent to the corresponding author of the manuscript to: (1) enter into an exclusive publishing agreement with Elsevier on my behalf, in the relevant form set out at [www.elsevier.com/copyright](http://www.elsevier.com/copyright); and (2) unless I am a US government employee, to grant an exclusive license of rights to Elsevier as part of that publishing agreement, effective on acceptance of the article for publication. If the article is a work made for hire, I am authorized to confirm this on behalf of my employer. I agree that the copyright status selected by the corresponding author for the article shall apply and that this agreement is subject to the governing law of England and Wales.

Does your manuscript have a reference number? No  Yes  If yes, enter number here: eclinm-D-20-00357

Does your manuscript have a handling editor? No  Yes  If yes, enter name here: Dr Claudia Schaefer

### Authors' contributions

Please insert here the contribution each author made to the manuscript—eg, literature search, figures, study design, data collection, data analysis, data interpretation, writing etc. If all authors contributed equally, please state this. The information provided here must match the contributors' statement in the manuscript.

AX, YG and HL had the idea for and designed the study and had full access to all the data in the study and take responsibility for the integrity of the data and the accuracy of the data analysis. YG, YZ and YS drafted the paper. AX, YG, YZ, YS, WS, QX, JJ and LL did the analysis, and all authors critically revised the manuscript for important intellectual content and gave final approve for the version to be published. YZ, YS, WS, HL and YG collected the data. All authors agree to be accountable for all aspects of the work in ensuring that questions related to the accuracy or integrity of any part of the work are appropriately investigated and resolved.

## Role of the funding source

Please disclose any funding sources and their role, if any, in the writing of the manuscript or the decision to submit it for publication. Examples of involvement include: data collection, analysis, or interpretation; trial design; patient recruitment; or any aspect pertinent to the study. Please also comment whether you have been paid to write this article by a pharmaceutical company or other agency. If you are the corresponding author, please indicate if you had full access to all the data in the study and had final responsibility for the decision to submit for publication. The information provided here must match the role of the funding source statement in the manuscript.

The funders of the study had no role in study design, data collection, data analysis, data interpretation, writing of the Article, or the decision to submit for publication. All authors had full access to all the data in the study and had final responsibility for the decision to submit for publication.

## Conflicts of interest

Please complete the ICMJE conflict of interest form, which is available at <http://www.thelancet.com/for-authors/forms#icmje-coi>. Please ensure that a conflict of interest statement is included at the end of the manuscript, which matches what is declared on the ICMJE conflict of interest form.

**Patient consent (if applicable) - completion of this section is mandatory for Case Reports, Clinical Pictures, and Adverse Drug Reactions.** Please sign below to confirm that all necessary consents required by applicable law from any relevant patient, research participant, and/or other individual whose information is included in the article have been obtained in writing. **The signed consent form(s) should be retained by the corresponding author and NOT sent to EClinicalMedicine.**

I agree with: the plan to submit to *EClinicalMedicine*; the contents of the manuscript; to being listed as an author; and to the conflicts of interest statement as summarised. I have had access to all the data in the study (for original research articles) and accept responsibility for its validity.

|                              |                     |                                                                                                  |                                                |                 |
|------------------------------|---------------------|--------------------------------------------------------------------------------------------------|------------------------------------------------|-----------------|
| Title and name: Yumiao Zhao  | Highest degree: PhD | Signature:  | 数字签名者: Yumiao Zhao<br>日期: 2020.06.28 14:13:02  | Date: 2020.6.28 |
| Title and name: Yaomin Shang | Highest degree: MD  | Signature:  | 数字签名者: Yaomin Shang<br>日期: 2020.06.28 14:15:07 | Date: 2020.6.28 |
| Title and name: Wenbin Song  | Highest degree: MD  | Signature:  | 数字签名者: Wenbin Song<br>日期: 2020.06.28 14:16:40  | Date: 2020.6.28 |
| Title and name: Qingquan Li  | Highest degree: MD  | Signature:  | 数字签名者: Qingquan Li<br>日期: 2020.06.30 20:56:29  | Date: 2020.6.28 |
| Title and name: Qinfu Xu     | Highest degree: MD  | Signature:  | 数字签名者: Qinfu Xu<br>日期: 2020.06.30 20:58:49     | Date: 2020.6.28 |
| Title and name: Hongli Mao   | Highest degree: MD  | Signature:  | 数字签名者: Hongli Mao<br>日期: 2020.06.30 21:06:05   | Date: 2020.6.28 |
| Title and name: Xiuman Zhou  | Highest degree: PhD | Signature:  | 数字签名者: Xiuman Zhou<br>日期: 2020.06.28 14:31:32  | Date: 2020.6.28 |
| Title and name: Hong Luo     | Highest degree: MD  | Signature:  | 数字签名者: Hong Luo<br>日期: 2020.06.28 14:32:25     | Date: 2020.6.28 |
| Title and name: Yanfeng Gao  | Highest degree: PhD | Signature:  | 数字签名者: Yanfeng Gao<br>日期: 2020.06.29 10:04:33  | Date: 2020.6.29 |
| Title and name: Aiguo Xu     | Highest degree: PhD | Signature:  | 数字签名者: Aiguo Xu<br>日期: 2020.06.30 21:08:26     | Date: 2020.6.29 |

## Corresponding author declaration

I  [Aiguo Xu], the corresponding author of this manuscript, certify that the contributors' and conflicts of interest statements included in this paper are correct and have been approved by all co-authors.
